# Supplementary material for: An ingenious one-dimensional zirconium phosphonate with efficient strontium exchange capability and moderate proton conductivity
Source: Royal Society of Chemistry journal article supplement (doi:10.1039/c8dt00508g), 2018-01-01
Supplement: c8dt00508g1.pdf [file c8dt00508g1.pdf]

## **Ingenious One-Dimensional Zirconium Phosphonate with Efficient Strontium Exchange Capability and Moderate Proton Conductivity**

Jiarong Zhang<sup>a,b</sup>, Lanhua Chen<sup>b</sup>, Daxiang Gui<sup>b</sup>, Haowen Zhang<sup>b</sup>, Duo Zhang<sup>b</sup>, Wei Liu<sup>b</sup>, Guolin Huang<sup>\*a</sup>, Juan Diwu<sup>\*b</sup>, Zhifang Chai<sup>b</sup>, and Shuaowang<sup>\*b</sup>

<sup>a</sup>State Key Laboratory Breeding Base of Nuclear Resources and Environmental,  
East China Institute of Technology, Nanchang, 330013, China.

E-mail: guolinhuang@sina.com

<sup>b</sup>State Key Laboratory of Radiation Medicine and Protection, School for Radiological  
and interdisciplinary Sciences (RAD-X) and Collaborative Innovation Centre of  
Radiation Medicine of Jiangsu Higher Education Institutions, Soochow University,  
Suzhou 215123, China

E-mail: diwujuan@suda.edu.cn, shuaowang@suda.edu.cn

## **Table of Contents**

**S1. Experimental section**

**S2. X-ray crystallography**

**S3. Bond Valence Sum (BVS)**

**S4. Powder X-ray diffraction (PXRD)**

**S5. FT-IR spectrum**

**S6. SEM-EDS analysis of SZ -5 before and after ion-exchange**

**S7. XAFS fit results for Sr-sorbed SZ-5 samples**

**S8. Crystal structure of  $\text{Sr}_3(\text{PO}_4)_2$**

**S9. Proton conductivity measurements of SZ-5**

## S1. Experimental section

*Materials:* All chemical reagents and solvents purchased from commercial suppliers and directly used as received. ***Caution! Sr-90 used in this study is a high-energy  $\beta$  emitter with the daughter of radioactive Y-90. All Sr-90 experiments were performed in an authorized laboratory designed for radiological studies. Standard protections for radioactive materials should be followed.***

*Synthesis of SZ-5:* the mixture of  $\text{ZrOCl}_2 \cdot 8\text{H}_2\text{O}$  (64.4 mg, 0.2 mmol), methylenediphosphonic acid (35.2 mg, 0.2 mmol),  $\text{HNO}_3$  (100  $\mu\text{L}$ ), HF (50  $\mu\text{L}$ ) and 2.5 ml mixed solvent ( $V_{\text{DMA}} : V_{\text{H}_2\text{O}}$  (ml) = 4 : 1) was added into a 10mL stainless steel PTFE vial. Then, the vial was heated to 200 °C for 3 days and cooled to room temperature at a rate of 5 °C/h. Colourless crystals were finally obtained as a pure phase.

*X-ray Crystallography Studies:* Single crystal X-ray diffraction data collections of **SZ-5** were performed on a Bruker D8-Venture diffractometer with a Turbo X-ray Source (Mo–K $\alpha$  radiation,  $\lambda = 0.71073$  Å) adopting the direct-drive rotating anode technique and a CMOS detector under 298 K. The data of **SZ-5** was collected using the program APEX3 and then processed using SAINT routine in APEX3. The structure of **SZ-5** was solved by direct methods and refined by the full-matrix least squares on  $F^2$  using the SHELXTL.

## Characterizations and Methods

*Instrumentations:* Powder X-ray diffraction (PXRD) patterns were collected from 5° to 50° with a step of 0.02° on a Bruker D8 Advance diffractometer with Cu K $\alpha$  radiation ( $\lambda=1.54056$  Å) and a Lynxeye one-dimensional detector. Elemental analysis (C, N, and H) were performed with a Vario EL CHNOS elemental analyzer and the results were calculated to be N, 5.701%; C, 13.5%; H, 4.266%. The FT-IR spectra of **SZ-5** without KBr were recorded in the range of 4000-400 cm<sup>-1</sup> on a Thermo Nicolet iS50 spectrometer. Thermogravimetric analyses were carried out on a NETZSCH STA449F3 instrument in the range of 30-900 °C under a nitrogen flow at a heating rate of 10 K/min for the dried samples of **SZ-5**. Scanning electron microscopy images and energy-dispersive spectroscopy data (SEM/EDS) were recorded on a FEI Quanta 200FEG Scanning Electron Microscope with the energy of the electron beam being 30 keV. **SZ-5** samples were directly mounted on the carbon conductive tape, and then coated with Au. The concentration of nonradioactive Sr<sup>2+</sup> was determined by inductively coupled plasma-atomic emission spectrometry (ICP-AES, Thermo Fisher Scientific iCAP 7000) or inductively coupled plasma-mass spectrometry (ICP-MS, Thermo Finnigan high resolution magnetic sector Element 2) depending on the specific concentration, meanwhile the radioactive Sr<sup>2+</sup> in solution were measured using a liquid scintillation counting system (LCS).

*Hydrolytic Stability Measurements:* Hydrolytic stability measurements for **SZ-5** was studied by stirring the samples in HNO<sub>3</sub> or NaOH solutions with different pH of 4 to 11 for 1 d. The solids were re-collected and dried for PXRD patterns analysis.

*$\beta$  and  $\gamma$  Radiation Resistance Measurements:*  $\beta$  irradiation experiment was implemented using electron beams (1.2 MeV) provided by an electron accelerator. **SZ-5** was irradiated for two different doses (100 and 200 kGy), respectively, at a dose rate of 20 kGy/h.  $\gamma$  irradiation experiment was carried out using a <sup>60</sup>Co irradiation source ( $2.22 \times 10^{15}$  Bq). **SZ-5** was irradiated at a dose rate of 1.2 kGy/h for 100 kGy and 200 kGy, respectively. **SZ-5** exhibits excellent radiation resistance as the PXRD patterns for the irradiated **SZ-5** match well with the originated samples.

*Sr<sup>2+</sup> Sorption Experiments:* All the experiments were carried out at room temperature using the batch method. The solid/liquid ratio in all batch experiments was 1 g/L. In a typical ion-exchange experiment of **SZ-5**, 10 mg **SZ-5** was added into 10 mL aqueous solution containing certain Sr<sup>2+</sup>. The mixture was kept stirring for 12 h. The concentration of Sr<sup>2+</sup> in solution was determined by inductively coupled plasma mass spectrometry (ICP-MS) and/or inductively coupled plasma-atomic emission spectrometry (ICP-AES). The solids were separated by

centrifugation or filtration. The distribution coefficient  $K_d$  is given by the equation:

$$K_d = (V[(C_0 - C_e)/C_e])/m$$

where  $V$  is the volume (ml) of the testing solution,  $C_0$  and  $C_e$  are the initial and equilibrium concentration of  $\text{Sr}^{2+}$  (ppm), and  $m$  is the amount of the **SZ-5** samples (g) used in the experiment.

30 mg of **SZ-5** material was added into a 30 mL solution containing 10 ppm  $\text{Sr}^{2+}$ . The mixture was stirred by a magnetic bar for a desired contact time. The concentration of  $\text{Sr}^{2+}$  as a function of time was obtained to determine the exchange kinetics line. The  $\text{Sr}^{2+}$  removal from solutions of various concentrations was investigated by the batch experiment at the solid/liquid of 1 g/L at 12 h contact and room temperature. The data were used for the determination of  $\text{Sr}^{2+}$  adsorption isotherm. Competitive ion-exchange experiments of **SZ-5** were also performed with the batch method at the solid/liquid of 1 g/L at the contact time of 12 h and room temperature

*The Real Seawater Decontamination Experiment:* The **SZ-5** samples was added to 3 mL seawater containing radioactive  $^{90}\text{Sr}^{2+}$  with a total  $\beta$  activity of 2516 cpm and the solid/liquid ratios of 10:1 and 20:1, respectively. The mixture was then shaking for the contact time of 1 d and 7 d at room temperature. The  $^{90}\text{Sr}$  activity was determined by liquid

scintillation counting (LSC), which was used to calculate the  $^{90}\text{Sr}$  removal percentage.

*XAFS Data Collection:* Sr-sorbed **SZ-5** samples for XAFS analysis were prepared by batch experiments. The Sr  $\text{K}_{\text{III}}$ -edge XAFS spectra at 6777 eV were recorded at BL14W1 of the Shanghai Synchrotron Radiation Facility (SSRF, Shanghai, China)

*Proton Conductivity Measurements:* Proton conductivity measurement was carried out by alternating-current (ac) impedance spectroscopy used schistose sample in the controlled thickness range of 1 to 2 mm. Alternating current impedance of the **SZ-5** was conducted on a Solartron SI1260 Impedance/Gain-Phase Analyzer with applied ac voltage amplitude over a frequency range from 4 MHz to 1 Hz with an input voltage amplitude of 500 mV. The conductivity of **SZ-5** was calculated by the equation of:

$$\sigma = L/RS$$

Where S and L are the cross-sectional area and thickness of the pellet, respectively, and R, which was obtained from the impedance plots, is the value of resistance.

## **S2. X-ray crystallography**

**Table S1. Crystallographic data for SZ-5.**

|         |                                                                                       |
|---------|---------------------------------------------------------------------------------------|
| Formula | $[(\text{CH}_3)_2\text{NH}_2]_2[\text{Zr}(\text{CH}_2(\text{HPO}_3)(\text{PO}_3))_2]$ |
|---------|---------------------------------------------------------------------------------------|

|                                                                                                    |                |
|----------------------------------------------------------------------------------------------------|----------------|
| $Mr[\text{g mol}^{-1}]$                                                                            | 507.18         |
| Crystal system                                                                                     | triclinic      |
| Space group                                                                                        | $P \bar{1}$    |
| $a(\text{\AA})$                                                                                    | 5.4161(5)      |
| $b(\text{\AA})$                                                                                    | 8.4820(9)      |
| $c(\text{\AA})$                                                                                    | 10.2407(10)    |
| $\alpha(^{\circ})$                                                                                 | 98.482(5)      |
| $\beta(^{\circ})$                                                                                  | 91.994(5)      |
| $\gamma(^{\circ})$                                                                                 | 102.790(5)     |
| $V(\text{\AA}^3)$                                                                                  | 452.65(8)      |
| $Z$                                                                                                | 1              |
| $\rho_{\text{calcd}} (\text{g cm}^{-3})$                                                           | 1.861          |
| $M (\text{mm}^{-1})$                                                                               | 1.018          |
| $F(000)$                                                                                           | 246            |
| $T(\text{K})$                                                                                      | 298            |
| $R1, {}^a wR2^b (I > 2\sigma(I))$                                                                  | 0.0395, 0.1321 |
| $R1, {}^a wR2^b (\text{all data})$                                                                 | 0.0519, 0.1464 |
| $aR1 = \Sigma  Fo  -  Fc  /\Sigma Fo $ . $bwR2 = [\Sigma w(Fo^2 - Fc^2)^2/\Sigma w(Fo^2)^2]^{1/2}$ |                |

**Table S2. Selected bond distances ( $\text{\AA}$ ) of SZ-5**

|        |          |       |          |
|--------|----------|-------|----------|
| Zr1-O3 | 2.067(3) | P1-O1 | 1.555(3) |
|--------|----------|-------|----------|

|        |          |       |          |
|--------|----------|-------|----------|
| Zr1-O5 | 2.060(3) | P1-O2 | 1.501(3) |
| Zr1-O6 | 2.073(3) | P1-O3 | 1.539(3) |
|        |          | P2-O4 | 1.498(3) |
|        |          | P2-O5 | 1.548(3) |
|        |          | P2-O6 | 1.538(3) |

**Table S3. Hydrogen bond distances (Å) in SZ-5**

|         |             |
|---------|-------------|
| N1···O4 | 2.835       |
| O1···O2 | 2.467/2.544 |
| O1···O4 | 3.35        |

### S3. Bond Valence Sum (BVS) calculations

The bond valence of a bond length  $d_{ij}$  is calculated by the most commonly adopted empirical expression:

$$v_{ij} = \exp[(R_{ij} - d_{ij})/b].$$

Here  $b$  is equal to 0.37 Å,  $d_{ij}$  is the bond lengths in crystals.<sup>[1]</sup>

**Table S4. BVS data of O atoms.**

| Atom | BVS value |
|------|-----------|
| O1   | 1.1416    |
| O2   | 1.3210    |

|    |        |
|----|--------|
| O3 | 0.7037 |
| O4 | 1.3317 |
| O5 | 0.7172 |
| O6 | 0.6924 |

#### S4. Powder X-ray diffraction (PXRD)

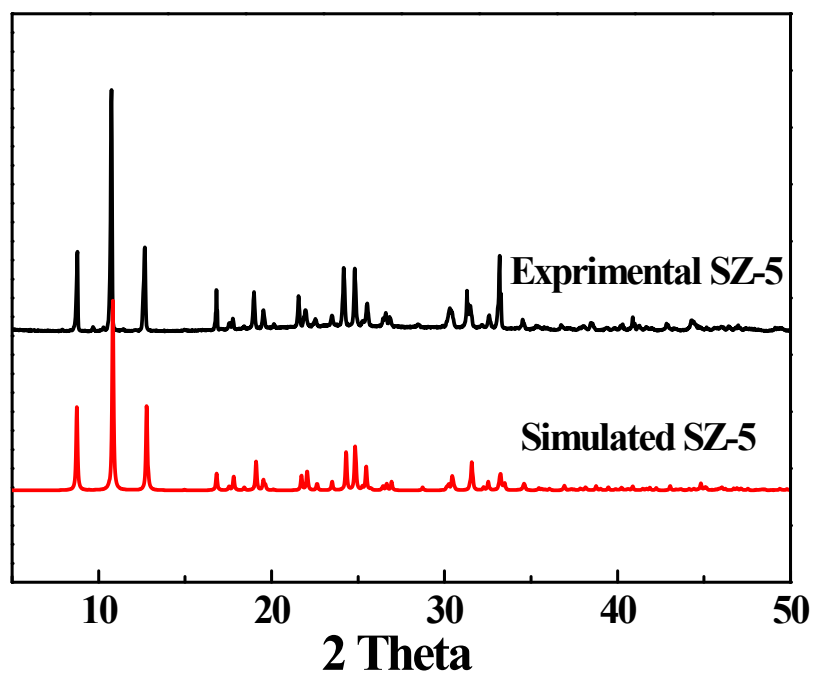

**Figure S1.** The powder X-ray diffraction (PXRD) for SZ-5

#### S5. FT-IR spectrum

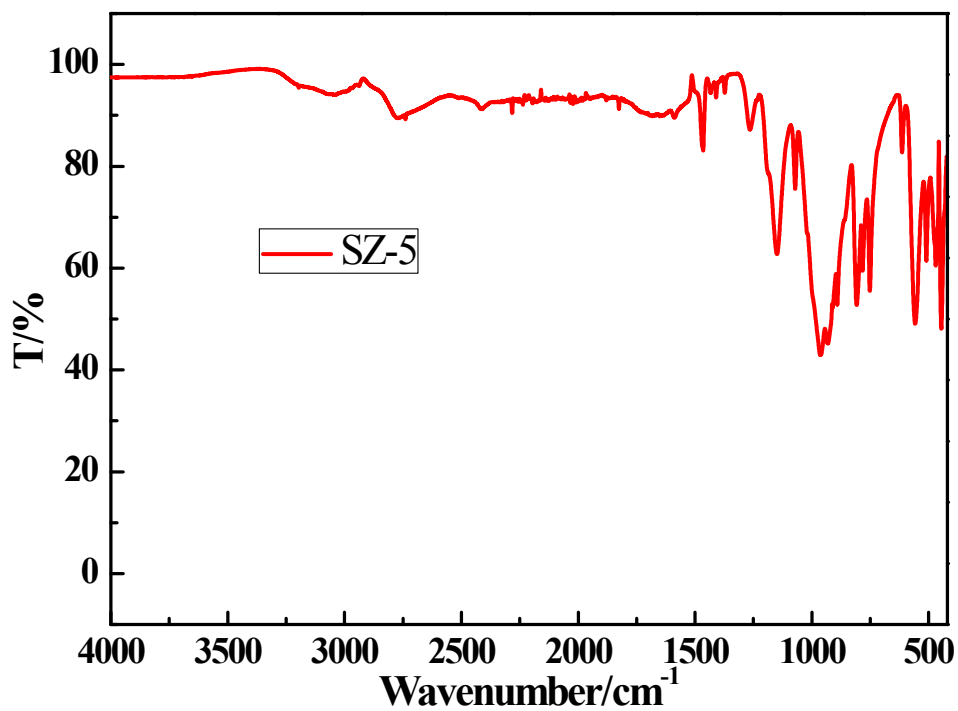

**Figure S2.** FT-IR spectrum of SZ-5.

## S6. SEM-EDS analysis

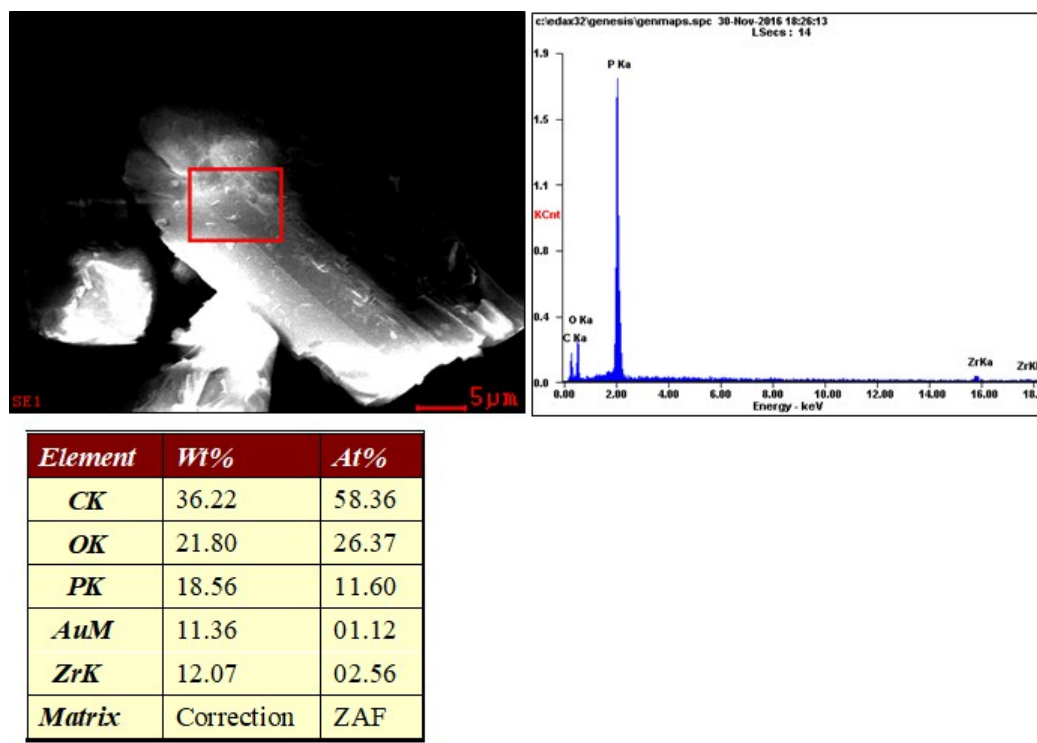

**Figure S3.** SEM images and EDS data of **SZ-5** before ion-exchange.

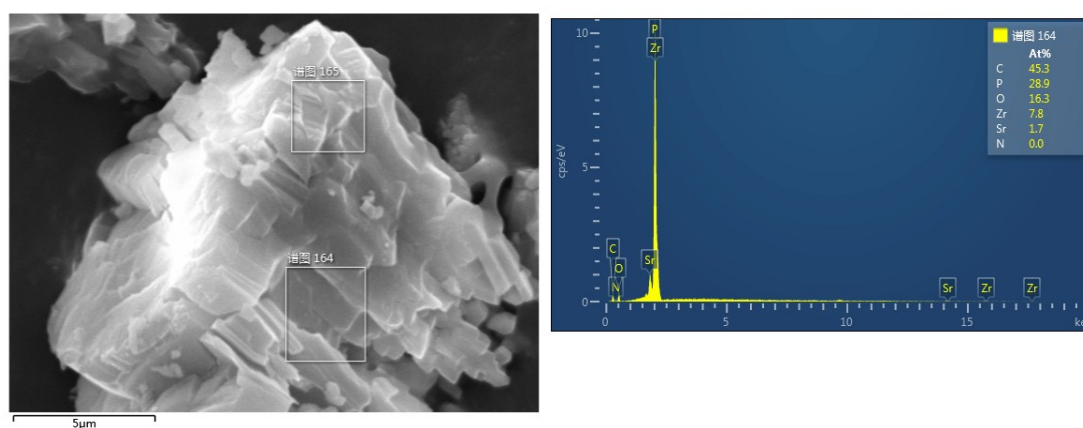

**Figure S4.** SEM images and EDS data of **SZ-5** after ion-exchange.

### S7. XAFS Fit results for Sr-sorbed SZ-5 samples.

**Table S5.** The structural parameters from the XAFS analysis

| Sample         | Shell | interaction | CN   | R (Å) |
|----------------|-------|-------------|------|-------|
| Sr-sorbed SZ-5 | 1     | Sr-O        | 7.24 | 2.36  |

CN = coordination numbers

### S8. Crystal structure of $\text{Sr}_3(\text{PO}_4)_2$

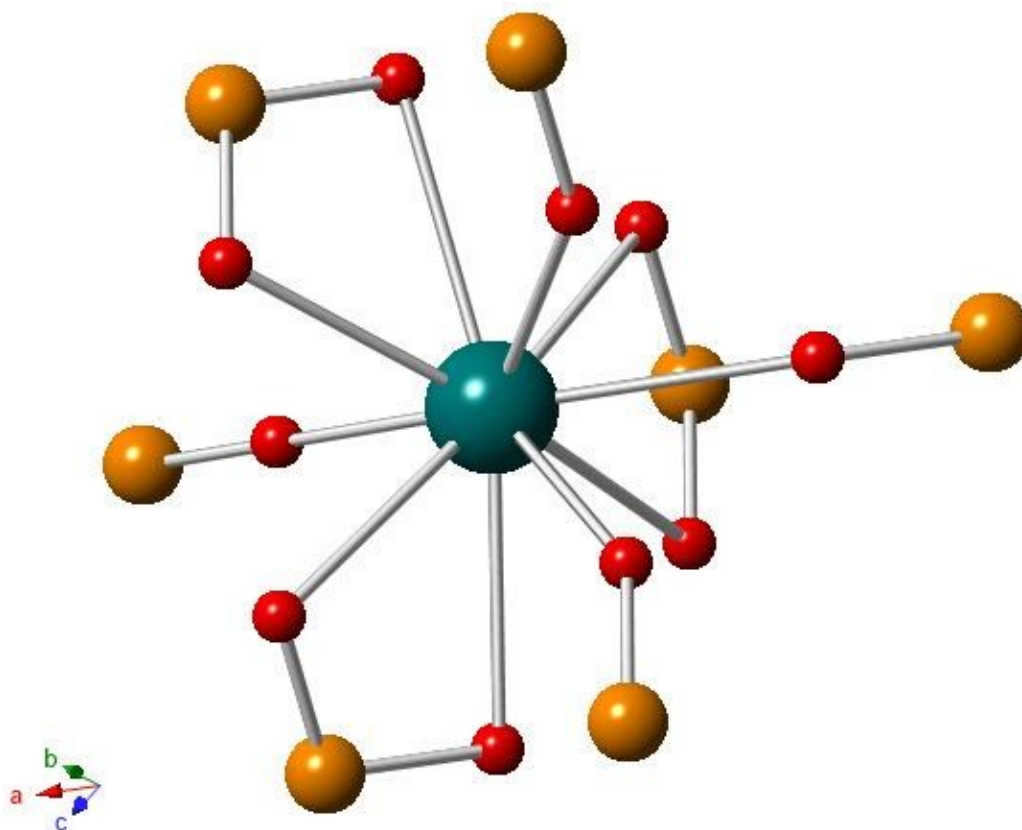

**Fig**

**ure S5.** Crystallographic data of  $\text{Sr}_3(\text{PO}_3)_2$  showing 10-coordinate  $\text{Sr}^{2+}$ .

Atom color codes: Sr = cyan, P = orange, O = red.

### S9. Proton conductivity of SZ-5

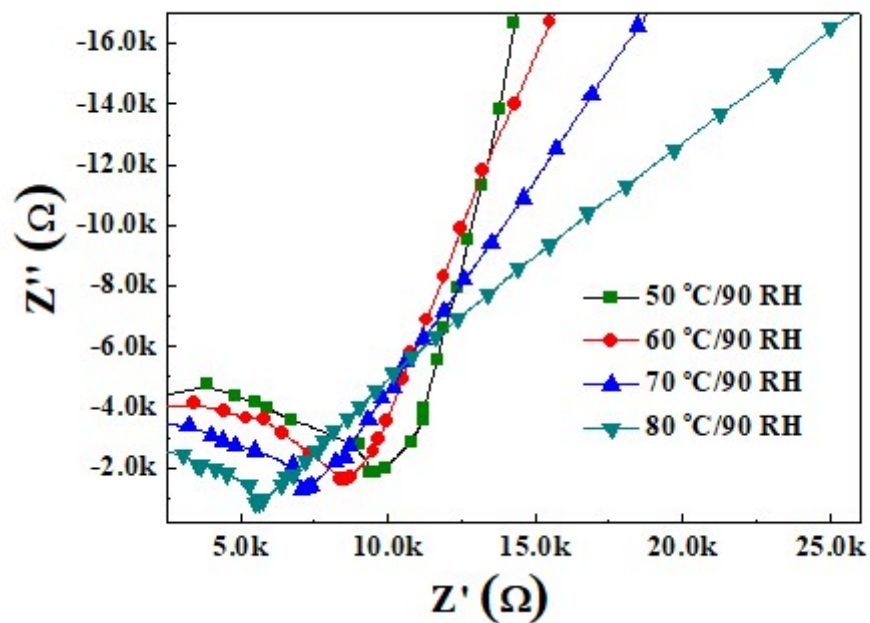

**Figure S6.** Impedance plots of **SZ-5** at different temperatures of 40-80 °C under 90% RH.

#### Reference:

- [1] N. E. Brese, M. O'Keeffe, *Acta Cryst.* 1991, B47, 192-197.
